# Supplementary material for: Mycobacteriophage Lysis Enzymes: Targeting the Mycobacterial Cell Envelope
Source: MDPI journal article supplement (doi:10.3390/v10080428), 2018-08-14
Supplement: s1 [file s1]

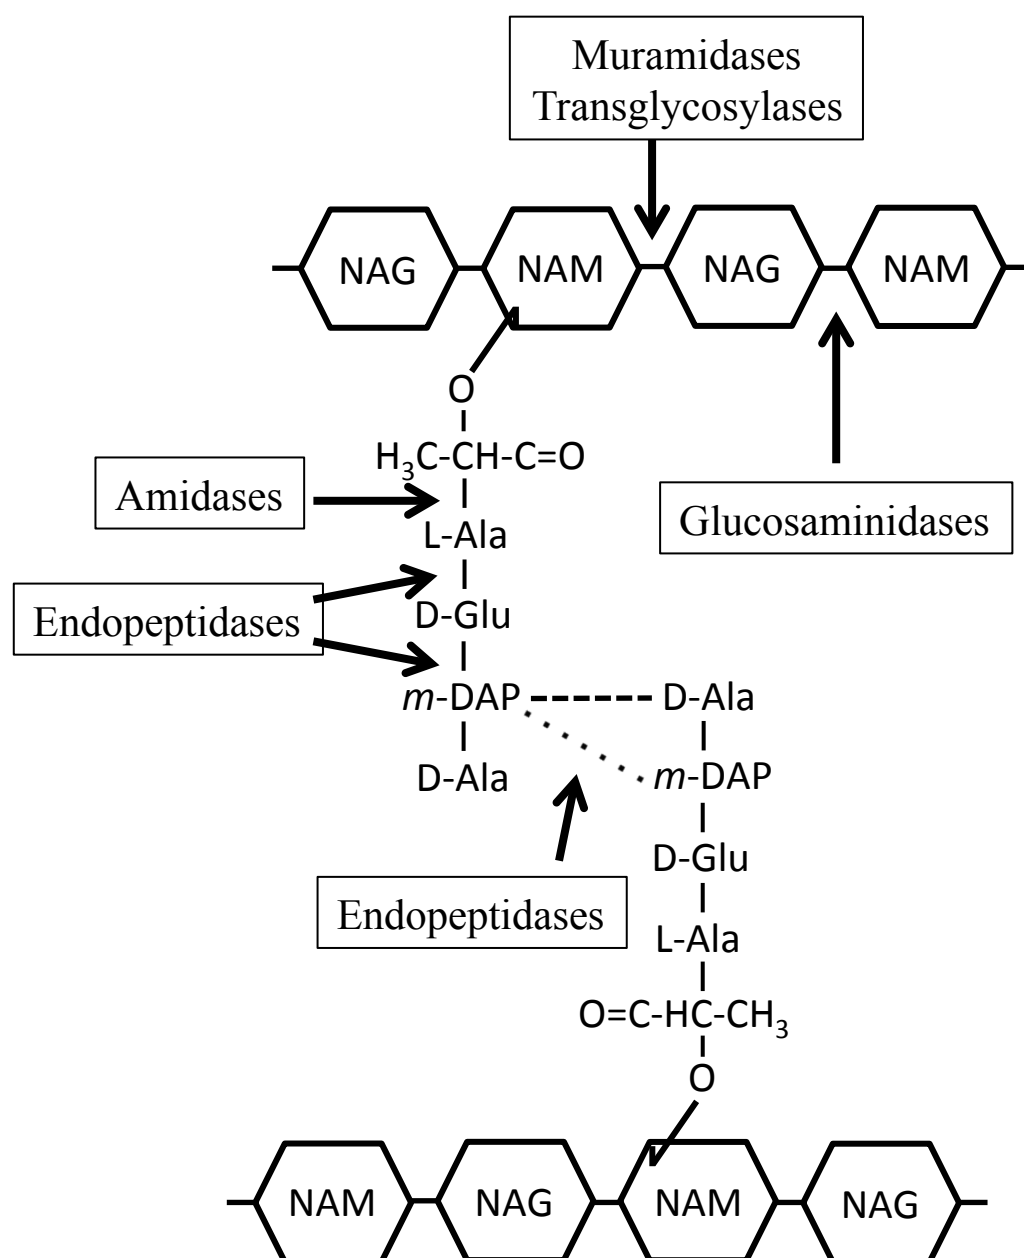

**Figure S1.** Schematic representation of the endolysins targets in the bacterial peptidoglycan. Proposed 4→3 interpeptide bridges between *m*-DAP and D-Ala but also 3→3 *m*-DAP to *m*-DAP bonds in the mycobacterial peptidoglycan are indicated by dashed lines. NAG, N-acetylglucosamine; NAM, N-acetylmuramic acid. In Pimentel M. Genetics of Phage Lysis. *Microbiol. Spectr.* **2014**, 2, 1–13, doi:10.1128/microbiolspec.MGM2-0017-2013
