# Supplementary material for: Mycobacteriophage Lysis Enzymes: Targeting the Mycobacterial Cell Envelope
Source: MDPI journal article supplement (doi:10.3390/v10080428), 2018-08-14
Supplement: s1 [file s1]

CLUSTAL O(1.2.4) multiple sequence alignment

|                          |                                                              |    |
|--------------------------|--------------------------------------------------------------|----|
| Dori_Gp41_Singleton      | MSARLPLKLGSSD-----A-RGDDV---THWQWRA---RAYA                   | 30 |
| Sparky_Gp27_Singleton    | MTARLPLKLGSSD-----A-RGDDV---THWQWRA---RAYA                   | 30 |
| Adjutor_Gp40_ClusterD    | ----MELKVGSSD-----ANTDGEV---TRWQNWV---KRYA                   | 27 |
| Predator_Gp40_ClusterH   | -----MGLPYKK-----GSNGPEI---KVVQDWA---YRYA                    | 25 |
| Nilo_Gp40_ClusterR       | -----MRVNGVWVGWGV-----GDHSAIDDTVRRAKAYMRAMYSYA               | 37 |
| Patience_Gp42_ClusterU   | -----MKGPDGSYIGIGL-----GDVSSEV---LKIKQFINRKFSRF-             | 34 |
| Gaia_Gp34_ClusterX       | -----                                                        | 0  |
| Bricole_Gp38_ClusterM    | -----MW---IGWQE-----GMSGRPV---LAAKGELRAKFSYGK                | 29 |
| TM4_Gp30_ClusterK        | -----MAW---VGWQL-----GMQGEQV---KVIQOKLIAKYQWVR               | 30 |
| Courthouse_Gp48_ClusterJ | ----MPLRLGDRNES-VRQWRIKMNAWFGP--LYTRLHGPLP---MDTDEFGPRAKSWQE | 50 |
| Kumao_Gp39_Singleton     | -----MAW---DGWKE-----GMAGPPV---LAAKRELKRKFSYAK               | 30 |
| Cosmo_Gp52_ClusterV      | -----MRVAGQWVGWGL-----GDIDPKV---QDMKRFLKRKFSYAR              | 34 |
| Ms6_LysB_ClusterF        | -----MRIDGQYVGLGP-----GDRSDEI---RKIKAFMRKFSY-A               | 33 |
| Corndog_Gp70_ClusterO    | -----MRIGGEYVGLGL-----GDASEEI---GRIRDFMRKFRSYA               | 34 |
| Bxz1_Gp238_ClusterC      | -----MR-VPPVTGEYVGLGL-----GDSSEI---RKIKEFMRKKFRSYA           | 37 |
| MooMoo_Gp29_Singleton    | -----MRIGGQYVGLGL-----GDSSPEI---RNIKTfMRKFFASYA              | 34 |
| D29_Gp12_ClusterA        | -----                                                        | 0  |
| LeBron-Gp26_ClusterL     | -----M-AKGLNGEWIGYGP-----GDSGTQV---LAAREKLKAKFSY-G           | 35 |
| MosMoris_Gp54_ClustersS  | -----MAKDPLTG-----AWIG---YGP GDVSPEV---QKVERRLLLAYP--K       | 35 |
| 32HC_Gp37_ClusterZ       | -----M-----AWKQPQLTDPPMVSEI---GKLNRRLLLAYA--A                | 31 |
| BPs_Gp28_ClusterG        | -----M-----AYQ-AP-RNVGDTHPLI---PAAKRKL---A--G                | 25 |
| Giles_Gp32_ClusterQ      | -----M-----AWKPTE-YQIGDRHPDI---ADAKERL-RRIA--A               | 29 |
| Orion_Gp50_ClusterB      | -----MTQPT-----AWQPP--QNVGDVAVTV---AQAKAKL---K--V            | 29 |
| Babsiella_Gp27_ClusterI  | ---MTELRYGGAQPAEAM-----AWQKA--IREFAKSYAL---AADGGPL---K--I    | 39 |
| Rubeelu_Gp27_ClusterN    | ---MTELRISSGGL-VA-----AWQRA--MVDRFEAYAL---AADGGPL---R--V     | 38 |
| Jebeks_Gp27_ClusterP     | ---MTELRVSSGGL-VA-----AWQQA--MVDRFEAYAL---AADGGPL---R--V     | 38 |
| Cuke_Gp31_ClusterAC      | -----                                                        | 0  |
| Porky_Gp35_ClusterE      | -----                                                        | 0  |
| Bipper_Gp35_ClusterY     | -----                                                        | 0  |
|                          |                                                              |    |
| Dori_Gp41_Singleton      | ESYAALMG-PVDGYYGNSDAEFTREMQRRLVAAGHAI-----AITGV-FDEAT        | 76 |
| Sparky_Gp27_Singleton    | ESYAALMG-PVDGYYGNSDAEFTREMQRRLVAAGHAV-----AITGV-FDEAT        | 76 |
| Adjutor_Gp40_ClusterD    | ASYSDIVG-PIDGYYGYSDADFTRELQRRLG-----L-----PITGV-FDDVT        | 68 |
| Predator_Gp40_ClusterH   | KSYADLIG-PKDAYFGNGEELFVKTMQGLG-----V-----AQGTGI-FGALE        | 66 |
| Nilo_Gp40_ClusterP       | GHLA-----DTNEFDREMEAAVIEMQORLVLOGRLE-----L--G-TYVTGV-LDLPT   | 81 |
| Patience_Gp42_ClusterU   | -KLL-----ETEIYDAAMEAAVRELQTIYKNNGT-L-----T--D-PFIPGV-VNLAT   | 76 |
| Gaia_Gp34_ClusterX       | -----                                                        | 9  |
| Bricole_Gp38_ClusterM    | N-----LDLTEHFGPDLTEALKTFQRN-----KGG-LRTDGV-LDYAT             | 65 |
| TM4_Gp30_ClusterK        | DRYP---RLTASGVYDVNTQAAIVEFQFRAGLPVT-----GI-ADYAT             | 69 |

|                          |                                                              |    |
|--------------------------|--------------------------------------------------------------|----|
| Courthouse_Gp48_ClusterJ | -----EYERR-----T-----NQP----VDGEVSDNDL                       | 69 |
| Kumao_GP39_Singleton     | H-----LVENTFFDHDLTVALMTYQVAKNIELAKR-----GEPL-LRTDGV-LDWYT    | 75 |
| Cosmo_GP52_ClusterV      | ESLD-----DSEVYDETMVRVMMQMQANYGD-----LDITGV-MNYAT             | 71 |
| Ms6_LysB_ClusterF        | ATLA-----DTEFYDEAMTAVVAEMQSRYNATAGQLR-----D--G-LYIPGI-INAET  | 77 |
| Corndog_GP70_ClusterO    | GNLPDTRNALGLPLFDEPMTVAVTEMQGRYLQSGELR-----D--G-LFIFGI-INAET  | 84 |
| Bxz1_GP238_ClusterC      | GHLA-----DTPHYDEQMTAVVAEMQGRYNQDGKLA-----T--G-KYTPGI-INAET   | 81 |
| MooMoo_GP29_Singleton    | GHLA-----DTELYDEQMVAVVTEMQARYNASGOLA-----S--D-KYTPGI-INAET   | 78 |
| D29_GP12_ClusterA        | -----                                                        | 0  |
| LeBron-Gp26_ClusterL     | KHLK-----LTTLYDAELLPLVLEFQLRTNVQRALT-----GKQL-LRVDGI-LDYAT   | 81 |
| MosMoris_GP54_Clusters   | NSHAVEHGVIIDVFTNGTAAALRDLTEFMNNDPREHERLAKLNVRLPMRSDGI-ADLNV  | 94 |
| 32HC_37_ClusterZ         | NSRAVEAGVQLHDVFDAAATDRALRNIQVHLAKTE-----DPKYNREPGV-LTYDC     | 80 |
| BPs_GP28_ClusterG        | NSYGAIGDDRSDDVYTEAFGAALIQYGNVHDLVLAG----RRPGPDVNV-EGI-FDWAI  | 79 |
| Giles_GP32_ClusterQ      | KLVAERLDNDNTDVFSFVADVLAEWKTAVHRDVLSG----RRQPPDVPDPTSTV-IDWAT | 84 |
| Orion_GP50_ClusterB      | FSYGAAFKTETSNVYTAEFGTALRTFQQRRAEIHG----KKPGPVMNT-DGV-LDWAT   | 83 |
| Babsiella_GP27_ClusterI  | DGWI-----GDDDAKVAAEYRSRR-----RLPPPPP-GVV-VTHEE               | 73 |
| Rubeelu_GP27_ClusterN    | DAYF-----GYDDAAVQREYERRT-----GQP--Q--DGV-VSEAD               | 69 |
| Jebeks_GP27_ClusterP     | DAYF-----GYDDAAVQREYERRT-----QQW--I--DGV-VSEGD               | 69 |
| Cuke_31_ClusterAC        | -----                                                        | 0  |
| Porky_GP35_ClusterE      | -----M-TTYGE                                                 | 6  |
| Bipper_GP35_ClusterY     | -----M-ATWDS                                                 | 6  |

|                          |                                                      |     |
|--------------------------|------------------------------------------------------|-----|
| Dori_GP41_Singleton      | AALVGYAGA-----PPAEERRPIWIYTAPGSGAPWN-----VGPSF       | 112 |
| Sparky_GP27_Singleton    | AAIVGYAGG---AKPPAATERRKIWIYTAPGSGAPWN-----IGPSF      | 115 |
| Adjutor_GP40_ClusterD    | ALHPKVNYRWKGQAGQPAARRKIWFYSNPGSGANEF-----VGPSF       | 110 |
| Predator_GP40_ClusterH   | AGLTGFKAGS-VVISPPVIERRKIWFYSNPGSGANEF-----VGPSF      | 107 |
| Nilo_GP40_ClusterP       | QIAMG-----FKKAPN--PVRPIIITVEGHLSSMY-----VGP--        | 112 |
| Patience_GP42_ClusterU   | KYAIG-----YLKK-D--VILPIHFSVEGHMSDMW-----IGP--        | 106 |
| Gaia_GP34_ClusterX       | AMLNG-----EF-----YIPAGTIIITANGTGVPDG-----SGPGF       | 39  |
| Bricole_GP38_ClusterM    | QKALG-----VLEA----LKPWVFTVAGTGAGWD-----AGY--         | 93  |
| TM4_GP30_ClusterK        | QVRLG-----AVAPAPPPRQRIMVLTFSGTSADMW-----TGY--        | 102 |
| Courthouse_Gp48_ClusterJ | RA-----LNVVPVPTKVVIPTVAGTGARWD-----QTY--             | 96  |
| Kumao_GP39_Singleton     | QK-----VLGLLDRKVVIFTVSGTGAVWS-----QGY--              | 102 |
| Cosmo_GP52_ClusterV      | QVRSG-----YLKVEK--PPLPTLYTVHGTGVSMW-----DGP--        | 102 |
| Ms6_LysB_ClusterF        | KYVMG-----YLSRPV-IDTRPVLFITVCGTGVPWW-----VGP--       | 109 |
| Corndog_GP70_ClusterO    | KYVMG-----YLERPPGPDTRPLFITVCGTGVPWW-----VGP--        | 117 |
| Bxz1_GP238_ClusterC      | KYVMN-----YLERPAGPDNRPVLFITVCGTGVPWW-----VGP--       | 114 |
| MooMoo_GP29_Singleton    | KYVMG-----YLQRPDPGPDTRGVLLTVCGTGVPWW-----VGP--       | 111 |
| D29_GP12_ClusterA        | -----MSKPWLFTVHGTGQDPD-----LGPGL                     | 22  |
| LeBron-Gp26_ClusterL     | QVALG-----IVAPPA--VVKPLLFTVHGTGQVPV-----DGPGL        | 114 |
| MosMoris_GP54_Clusters   | RRAIG-----AYID----P-----PAAV-----QSKY                | 112 |
| 32HC_37_ClusterZ         | KVRLG-----VIVP----A-----PAAP-----DKRF                | 98  |
| BPs_GP28_ClusterG        | QRQME-----LT-----A-----PPAPPAPPRDRALAYVVRGTGGII-QQDL | 115 |

|                         |                                                        |     |
|-------------------------|--------------------------------------------------------|-----|
| Giles_Gp32_ClusterQ     | KVQLG-----MIAR----A-----TPPAPAPPKARHLGIVFRGTGGII-GQDY  | 122 |
| Orion_Gp50_ClusterB     | KKQLG-----ILPE----Q-----TAPAPPPVPANRAAALVFRGTGGII-GQDY | 122 |
| Babsiella_Gp27_ClusterI | YAALV-----K-----TAPPPPKPRHLAIVFRGTGGVI-GQDY            | 105 |
| Rubeelu_Gp27_ClusterN   | LRLAG-----L-----LDTPATKPRHLAIVFRGTGGAI-GQDY            | 101 |
| Jebeks_Gp27_ClusterP    | LRLAG-----L-----LDTPATRPRHLAIVFRGTGGVI-GQDY            | 101 |
| Cuke_31_ClusterAC       | -----M-----SDRIFFLWLPGTWEVDSLKAENPSATNFVGLGKWLVDDRF    | 41  |
| Porky_Gp35_ClusterE     | LKALR-----LGVK----YVRHTLFTVAGTWADMW-----SGY            | 35  |
| Bipper_Gp35_ClusterY    | ILDYL-----RGD----PCKVGYFGVPGTWSPWD-----AGY             | 34  |

|                          |                                                              |     |
|--------------------------|--------------------------------------------------------------|-----|
| Dori_Gp41_Singleton      | ELGELCRKIL-----KLNHQPVG-YP--IGG----YLGLMGGDPALSYLDVIGAQAEEFA | 160 |
| Sparky_Gp27_Singleton    | ELGELCRKIL-----KINHQPVG-YP--IGG----YLGLMGGDPALSYLDVIGAQAEEFA | 163 |
| Adjutor_Gp40_ClusterD    | EVGEFCKNVL-----KINHQPVH-SA--IGG----YLGLMGGDPKFSYNDVIYDQYKSLE | 158 |
| Predator_Gp40_ClusterH   | EVGEFCKNVL-----KINHQPVH-SA--IGG----YLGALGGDSKLSYNEVIFDQYKSIE | 155 |
| Nilo_Gp40_ClusterP       | C-AYVASKL--ESEGVCWWQPIG-YD-----NTSLPFRN--QTGISAVL            | 150 |
| Patience_Gp42_ClusterU   | A-AYVGEVL--RAENRALHFPTG-YD-----NRALPFNN--KSGVEQLV            | 144 |
| Gaia_Gp34_ClusterX       | S-ADLARELDRAEGMWVWRWIN-YP-----AAVFPMRPSIGILRNNLK             | 81  |
| Bricole_Gp38_ClusterM    | P-AEVARAV----PSIFYWQPVN-YP-----AKPFPMGSSVDAGIAELK            | 131 |
| TM4_Gp30_ClusterK        | P-ADVARALD---PSIFYWQPVN-YP-----PAIFPMGSSAKSGEVEGL            | 145 |
| Courthouse_Gp48_ClusterJ | P-YDLGRWQD---QNRVILQPIG-YP-----AATFPMGPSVDKGEAELV            | 135 |
| Kumao_Gp39_Singleton     | P-FDVAMRQD---QSKVIVQPIG-YP-----AAVFPMEHSANEGEREVL            | 141 |
| Cosmo_Gp52_ClusterV      | P-ADCARRL---LDKYRWQPVGNYP-----ASAFPMWPSIQAGCLELN             | 141 |
| Ms6_LysB_ClusterF        | D-ADTARAV---EDQYLWQPIG-YP-----AAPFPMGRSITAGITEAH             | 147 |
| Corndog_Gp70_ClusterO    | D-ADTARAC---EDKLFWQPIG-YP-----AKNFPMGKSIAAGIDQCH             | 155 |
| Bxz1_Gp238_ClusterC      | D-AETARQV---EDLYRWQPVG-YP-----AAPFPMGPSIEAGKAELR             | 152 |
| MooMoo_Gp29_Singleton    | D-ADTARAV---ENVYKWRPVG-YR-----AAPFPMGASIAEGRAEAN             | 149 |
| D29_Gp12_ClusterA        | P-ADTARDV---LDIYRWQPIGNYP-----AAAFPMWPSVEKGVAELI             | 61  |
| LeBron-Gp26_ClusterL     | P-ADTARNV---LDKWDWQPIGNYP-----AEPFPMWPSILKGVAELR             | 153 |
| MosMoris_Gp54_ClusterS   | P-I---QGVF-----HNTN-----AFLNPDPFHNQVATNEGAAEAL               | 145 |
| 32HC_37_ClusterZ         | V-Q---QGVG-----FSTD-----AFLMGDPHTSYVDAVREGSAELL              | 131 |
| BPs_Gp28_ClusterG        | V-SLVCQGVA---DLVDEVNPP-WAATMGGIPVGV--AGGIGDPSMWSAVQATLAWTQ   | 166 |
| Giles_Gp32_ClusterQ      | V-SRVLQACA---DLVEEVHPA-FAATMGGIPVGT--AGGINDPSMAHAVALAFADAQ   | 173 |
| Orion_Gp50_ClusterB      | V-SQVCQQVG---PMVEEINPE-FPASMGGGLPPGA-----PNLPSARQAIDIGYRSGA  | 170 |
| Babsiella_Gp27_ClusterI  | V-SRVCQGAA---DLVEERNPE-WAASMGGGLPPGA-----PNSPSMNKAVQVAVASGA  | 153 |
| Rubeelu_Gp27_ClusterN    | V-SRVCQGAA---DLIEERNPE-FPASVGGLPPGA-----PNSPSMNKAVQIGVAAGA   | 149 |
| Jebeks_Gp27_ClusterP     | V-SRVCQGAA---DLVEERNPE-WAASMGGGLPPGA-----PNSPSMNKAVQVAVASGA  | 149 |
| Cuke_31_ClusterAC        | P-DRLPLNIF---E-PIMLCPPD-YMASFGPIPAAGSSIFSANNHLSYKESVLDAVEHSV | 95  |
| Porky_Gp35_ClusterE      | P-ADVARLVD---EDLFRWQPVW-YPASFGPVGNP-----LG-RSYQESVQDGVKELI   | 82  |
| Bipper_Gp35_ClusterY     | Q-ADVGRLIN---SAWFYWQGVG-YVAAFGPVNGP-----ITNPSYAESVQEGVDETV   | 82  |

# G-X-S-X-G

|                          |                                                             |     |
|--------------------------|-------------------------------------------------------------|-----|
| Dori_Gp41_Singleton      | RLLRANPDVIEAMAARRRDRNARVDVEIWVSGYSQSADGFEDALEHLFGDGG-----   | 212 |
| Sparky_Gp27_Singleton    | RLLRINPDVIEAMAARRRDRNARVDVEIWVSGYSQSADGFEDALEHLFGDGG-----   | 215 |
| Adjutor_Gp40_ClusterD    | WLLDNNPDIKD-----PDVEFWFSGYSQKADGLEDALEILFGDGGFTIPKTGE       | 206 |
| Predator_Gp40_ClusterH   | WLLDNNPDIND-----PDLELWFSGYSQKADGLEDALEILFGDGGFVIPQTGE       | 203 |
| Nilo_Gp40_ClusterP       | NVLRQTVLLNG---NGQPTRPPLGTPWGIEGFSQGAIIVNRILMLLRDTTD-----    | 199 |
| Patience_Gp42_ClusterU   | QRVGAAEFFI-----DGKVIKFPPGTPWTASAFSQQGAMIWCDFYRQYLMPG-----   | 190 |
| Gaia_Gp34_ClusterX       | AMIRAT-----PGRLVLSAYSQSAIAFAYVWRDDILNPN-----                | 115 |
| Bricole_Gp38_ClusterM    | KLLRERMD-----RYPAAFVLIIGYSQGAIVTSMVWQNF---K-----            | 167 |
| TM4_Gp30_ClusterK        | RLLDEK-----ARDFDIYVLIIGYSQALPASRLMRRIL---S-----             | 179 |
| Courthouse_Gp48_ClusterJ | NQMRRHLD-----ANPSLNFILVGYSQGAIVTSRVLRRMM---S-----           | 171 |
| Kumao_Gp39_Singleton     | AQMRRHLD-----ANPSYVFILIIGYSQAMVVSRLVRRMM---S-----           | 177 |
| Cosmo_Gp52_ClusterV      | RLIEST-----PGKFTFAGYSQAMVTSIVYKYDLLDPM-----                 | 175 |
| Ms6_LysB_ClusterF        | NQANR-----WRERIETHGTALAGYSQGAIVLSELWMNHIAPED-----           | 186 |
| Corndog_Gp70_ClusterO    | VQFNRADP-----GFMHRQRIERNGVVLGYSQGAVVVSELWENNIKPAN-----      | 200 |
| Bxz1_Gp238_ClusterC      | AQINRMEP-----GFELRKQVERNGMVLAGYSQGAIVTSEVWEDDIRTSG-----     | 197 |
| MooMoo_Gp29_Singleton    | RII-----VEERDRIEKYGLALAGYSQGAIVTSELWEYDIKPTS-----           | 188 |
| D29_Gp12_ClusterA        | LQIELKLD-----ADPYADFAMAGYSQGAIVVGQVLKHHILPPT-----           | 100 |
| LeBron-Gp26_ClusterL     | VQIRKAFA-----ANPNRKIGFAGYSQGAVVVSLVMKYDFMAEG-----           | 192 |
| MosMoris_Gp54_ClusterS   | RLYSTM-----PGRDIVVLGYSMGGVTAQKFLN-----                      | 173 |
| 32HC_37_ClusterZ         | RLALPM-----VGVPKIGLAYSMGGDVLRAALE-----                      | 159 |
| BPs_Gp28_ClusterG        | TDFIARHK-----VNPKIRVVIGYSAGAIAAAMFRA-----                   | 198 |
| Giles_Gp32_ClusterQ      | RIFLERFR-----ANPRIRVVIGYSAGAVAAAMFRE-----                   | 205 |
| Orion_Gp50_ClusterB      | ---AWIK-----ANPSRKFVLGGYSLGEIVVAKLLTALFSPG-----             | 204 |
| Babsiella_Gp27_ClusterI  | ---AEIR-----SGRSFVLGGYSAGAIVASR-LRAMLEPG-----               | 184 |
| Rubeelu_Gp27_ClusterN    | ---AEIR-----SGRSFVLGGYSAGAIVASR-LRAMLEPG-----               | 180 |
| Jebeks_Gp27_ClusterP     | ---AEIR-----SGRSFVLGGYSAGAIVASR-LRAMLEPG-----               | 180 |
| Cuke_31_ClusterAC        | DVILKL-----PTDRPIIIGYSQGAEVAERL-KAEFLPG-----                | 129 |
| Porky_Gp35_ClusterE      | RLINA-----TPGTFFALVGYSQGAEVVSRV-LLEILFG-----                | 114 |
| Bipper_Gp35_ClusterY     | RLILA-----RPGPIVLGGYSQGAEVVYVW-AREFLTG-----                 | 114 |
|                          | .:*                                                         |     |
| Dori_Gp41_Singleton      | -----EFELIRD--RLNGIIQFGNPSKDK-----T-----GIAR-KT             | 241 |
| Sparky_Gp27_Singleton    | -----EFELIRD--RLNGVIQFGNPSKDK-----T-----GIAR-KT             | 244 |
| Adjutor_Gp40_ClusterD    | TVGPGKYRHLRP--RINGTIQFGNPSKQPGPTRVG---NR---PPGS-----GISR-KK | 251 |
| Predator_Gp40_ClusterH   | KVGPGKYRHLRG--RINGVIQFGNPSKET-----T-----GIAR-KQ             | 237 |
| Nilo_Gp40_ClusterP       | ----PMLQORYA--DLTRGLTFGDPYREKDVVAE--WVTDPKPGPTQ-----GISD--V | 243 |
| Patience_Gp42_ClusterU   | ----KPLHWRLK--DLRAVICCGNPDRKGVCDV--WIPDKPGPDRQ-----GIMDDEN  | 236 |
| Gaia_Gp34_ClusterX       | ----GELHHRLD--DIEAILYGDVPTPGIAYGNEL-GGVAPPGEVNGHVSGGIAG-PN  | 167 |
| Bricole_Gp38_ClusterM    | ----GS--DLEA--RIIGSITYGNPCRELHVANGNVA-EGIPVPEGR-----G-IS-DF | 210 |
| TM4_Gp30_ClusterK        | ----GDLQRFKS--KLIAGVTFGNPMREK----GHTF-PGGADPGGH-----G-LD-PQ | 220 |

|                          |                                                        |                            |     |
|--------------------------|--------------------------------------------------------|----------------------------|-----|
| Courthouse_Gp48_ClusterJ | ----GDLAHYYN--RCIAGVTFGNPMRER----                      | GH-F-VGVNDPGGQ-----G-LD-PK | 211 |
| Kumao_GP39_Singleton     | ----GDLRQYFD--RCIAGVTFGNPLRER----                      | GH-F-TGASDPGGQ-----G-LD-PE | 217 |
| Cosmo_GP52_ClusterV      | ----GRLHHRLP--DFMGGVTWGNPMREMKGAWTDGV-                 | GAVAGQNNG-----G-IA-ED      | 220 |
| Ms6_LysB_ClusterF        | ----SGLRWMKP--HVRKAVTWGNPNRELGHVWADHGGSPMAPSNTQ-----   | G-VS-SN                    | 232 |
| Corndog_Gp70_ClusterO    | ----GSLHWAKD--YVVKAVTWGNPNREVGAVWPDYGGSPMASLTSQ-----   | G-VS-ST                    | 246 |
| Bxz1_Gp238_ClusterC      | ----PIVGWAKD--HVLKAWAGNPNREQGKAYPDAG-APLAAADSA-----    | G-IT-GR                    | 242 |
| MooMoo_Gp29_Singleton    | ----GPLHWAKP--YVRKAWAGNPMREIGKAWPDPG-APVSGMGRG-----    | G-IT-QE                    | 233 |
| D29_Gp12_ClusterA        | ----GRLHRFLH--RLKKVIFWGNPMRQKGFAHSDEWIHPVAAPDTL-----   | G-IL-ED                    | 146 |
| LeBron-Gp26_ClusterL     | ----GEFNALYKAGQVIADVVTWGNPMRERGVQHSDDGT-KQVAPADTE----- | G-IL-ED                    | 239 |
| MosMoris_GP54_Clusters   | ----RLPVEWRK--YVRALVTFGDPSMPAEGSLLG---ND---PG-E-----   | GISK-AP                    | 213 |
| 32HC_37_ClusterZ         | ----KWPADRRG--EWSLFGVFGNPSKRPGPTLLG---ND---PGGQ-----   | GISG-VW                    | 200 |
| BPs_GP28_ClusterG        | ----WLLNFDPD--NYVCSFSFGDPTRPFGGGFFG---QP--APWGR-----   | GIST-IS                    | 240 |
| Giles_GP32_ClusterQ      | ----WLLTNYPD--NYLCSFSFGDPTRPAGGAYFG---GV--AAPGR-----   | GIST-WR                    | 247 |
| Orion_GP50_ClusterB      | ----GELAAFRD--NYVCSFHIGPPARPLGGAFYG---GT--AAPGV-----   | GIAS-NR                    | 246 |
| Babsiella_Gp27_ClusterI  | ----QPLAEYRE--NYVCGFALGNPSRPFGHTYYL---GA--IPNGR-----   | GISD-FQ                    | 226 |
| Rubeelu_Gp27_ClusterN    | ----QPLAAYRE--NYVCGFAFGNPCRPFGHTYYL---GA--IPNGR-----   | GISD-FQ                    | 222 |
| Jebeks_GP27_ClusterP     | ----QPLAEYRE--NYVCGFALGNPSRPFGHTYYL---GA--IPNGR-----   | GISD-FQ                    | 222 |
| Cuke_31_ClusterAC        | ----GRLSSY---FLLAHYTFGNPGRPGVTFPN---GN--TLPWG-----     | GISN-LN                    | 169 |
| Porky_GP35_ClusterE      | ----SLRHRLK--DFIGGGCFGNPYRAKGVSYPG---SGLPTSGHG-----    | IAP-VN                     | 156 |
| Bipper_GP35_ClusterY     | ----GRLAHRRG--DLLLLIVTFGNPCRAKGHGVNQ---AT--AHGWG-----  | ISR-K-                     | 154 |

\* \*

|                          |                                             |                             |     |
|--------------------------|---------------------------------------------|-----------------------------|-----|
| Dori_GP41_Singleton      | RPAWLL-----RLITNV----TTRG-----              | DFYAEATD-----TIRPLF         | 271 |
| Sparky_GP27_Singleton    | RPAWLL-----RLITNV----TTRG-----              | DFYAEATD-----AIRPLF         | 274 |
| Adjutor_GP40_ClusterD    | RPQWLT-----MMTWDIVTTSPGAP-----              | DFYAAADD-----DIRPLF         | 285 |
| Predator_GP40_ClusterH   | RPAWLR-----SLIRNV----TTKG-----              | DFYAEAPD-----NIRPIF         | 267 |
| Nilo_GP40_ClusterP       | RLTNTP-----SWWKVV----SRRG-----              | DLYSENP-DN-----EVGLNRSI     | 277 |
| Patience_GP42_ClusterU   | RMVNTP-----WYWLEL----ARKG-----              | DMYTDNESSG-----ERGLNKTAI    | 271 |
| Gaia_GP34_ClusterX       | CLRPEECLHPVTGRRVILSV----ANPG-----           | DLYASAPVGEVPWVEETEVEGALETMI | 217 |
| Bricole_GP38_ClusterM    | RLRSTP-----SWWYDF----AHGANSRFRGDIYTDTP----- | DDDAGEMMTAI                 | 250 |
| TM4_GP30_ClusterK        | CLVNTP-----DWWHDY----AAKG-----              | DIYTVGSGSN-----DEKANADMTFI  | 257 |
| Courthouse_GP48_ClusterJ | PLVDTP-----SWWYDY----AARG-----              | DIYSSGPGNN-----DRQAAEHMTSI  | 248 |
| Kumao_GP39_Singleton     | CLVDTP-----SWWHDY----AIPG-----              | DIYTCGPGNY-----DLAALEHMRAI  | 254 |
| Cosmo_GP52_ClusterV      | RLVGTP-----WNWRDY----AHKG-----              | DLYTDCEFD-----DEGE--YKRSV   | 254 |
| Ms6_LysB_ClusterF        | GMRNTP-----DWWRDY----AHQG-----              | DLYACTEPG-----DTQE--VRNAI   | 266 |
| Corndog_GP70_ClusterO    | GMRDTP-----SWWRNY----AHAG-----              | DLYAAAEPPG-----DSQQ--DKNAI  | 280 |
| Bxz1_Gp238_ClusterC      | LMTDTP-----DWWRNRY----AHQG-----             | DLYTATRPG-----ESRE--DKVAI   | 276 |
| MooMoo_GP29_Singleton    | LMVDTP-----EWWRNRY----AHAG-----             | DLYTDVADD-----EAAE--NKRAI   | 267 |
| D29_GP12_ClusterA        | RLENLEQY-----GFEVRDY----AHDG-----           | DMYASIKED-----DLHE--YEVAI   | 183 |
| LeBron-Gp26_ClusterL     | RLQGTP-----AMWREY----AHKG-----              | DMYAAACELT-----GVQRGDNKRAI  | 275 |
| MosMoris_GP54_Clusters   | QPTWI-----RDRYWSY----SIDG-----              | DWYPRARG-----LLFLM          | 242 |

|                         |                                                             |     |
|-------------------------|-------------------------------------------------------------|-----|
| 32HC_37_ClusterZ        | YPEWT-----TGRLYDF----TLPG-----DMYPNSVG-----LLPQI            | 229 |
| BPs_Gp28_ClusterG       | YGD-----TDYRHCWL----THEG-----DMYAQIPG-----GVVGDIMDDV        | 274 |
| Giles_Gp32_ClusterQ     | YGDI-----RDYRHCWL----AAPG-----DMYTSVPD-----NAVGDIMDTA       | 281 |
| Orion_Gp50_ClusterB     | LATDI----YAQLGPRACYL----CDPE-----DMYGSIPVPV-----EGGTGDIMETV | 287 |
| Babsiella_Gp27_ClusterI | LPRSC----C---TWDWCEL----VHPD-----DMYANVPL-----GDAGDIMTAI    | 261 |
| Rubeelu_Gp27_ClusterN   | LPRSC----C---TWDWCEL----VHPD-----DMYANVPL-----GDAGDIMTAI    | 257 |
| Jebeks_Gp27_ClusterP    | LPRSC----C---TWDWCEL----VHPD-----DMYANVPL-----GDAGDIMTAI    | 257 |
| Cuke_31_ClusterAC       | IP--T----PQG--TFYRSY----AFYD-----DMYANANP-----K---SYLFEF    | 200 |
| Porky_Gp35_ClusterE     | LAPDI----LPA--EMWEEW----WNEG-----DLYAQNLD-----GKSGEIITSF    | 192 |
| Bipper_Gp35_ClusterY    | -PPLT----ELL--PIWLDY----ALPG-----DMYCCADD-----D---TYLAIG    | 186 |

\* \*

|                          |                                                              |     |
|--------------------------|--------------------------------------------------------------|-----|
| Dori_Gp41_Singleton      | YEFIRAETELPFVVYSAQI-ILPALLNLVAPFLG-----GGLANPA               | 312 |
| Sparky_Gp27_Singleton    | YEFIRAETELPFVVYSAQI-ILPALLNLVAPFLA-----GGLASPL               | 315 |
| Adjutor_Gp40_ClusterD    | YEFIKADTELPFVVYTAQI-IIPALLNLLAPFL-----GGFGGVTSPL             | 328 |
| Predator_Gp40_ClusterH   | YQVIVDSESELPFFVVRVLR-APILIKWAATILPIFVP----L---AAAGGFPMVQ-I   | 318 |
| Nilo_Gp40_ClusterP       | YKIAAENSW-----                                               | 286 |
| Patience_Gp42_ClusterU   | AKIITQNKW-----                                               | 280 |
| Gaia_Gp34_ClusterX       | FEAVMD-----                                                  | 223 |
| Bricole_Gp38_ClusterM    | YRLVQDLKNI-----                                              | 260 |
| TM4_Gp30_ClusterK        | YQLVQGDILGMMFGTGNPLD-----IL-----GLLGLGG-----                 | 287 |
| Courthouse_Gp48_ClusterJ | YLAVMGKFIL-----                                              | 258 |
| Kumao_Gp39_Singleton     | YLAVQGHFLT-----                                              | 264 |
| Cosmo_Gp52_ClusterV      | CKIVMG-HNV-----                                              | 263 |
| Ms6_LysB_ClusterF        | WQIVRD-LDL-----                                              | 275 |
| Corndog_Gp70_ClusterO    | WQIIRD-LNF-----                                              | 289 |
| Bxz1_Gp238_ClusterC      | WQIVRG-TNI-----                                              | 285 |
| MooMoo_Gp29_Singleton    | WAIVRG-TKV-----                                              | 276 |
| D29_Gp12_ClusterA        | GRIVMKASGF-----                                              | 193 |
| LeBron-Gp26_ClusterL     | CKIVMW-HEV-----                                              | 284 |
| MosMoris_Gp54_ClusterS   | YDILTRAALTMEFAV--YLFQTQLPSRLFQELIGME-----DSDDP----LA         | 282 |
| 32HC_37_ClusterZ         | YQILVRMEASVEFAL--YLFNLLTSSFGPALLGLA-----AGGLGPATAGF          | 273 |
| BPs_Gp28_ClusterG        | YEEVTRFAFRDILQVATRMVSAIPTI---AGKAGIPLP-----AVF-----          | 312 |
| Giles_Gp32_ClusterQ      | YDIVTQVELSDFLGTAFGVARQIPII---MEEAGIGLP-----SVF-----          | 319 |
| Orion_Gp50_ClusterB      | YDMVTTLALNDFLNTAAAMLPHILEI---AQDAGIFGL-----LGLGGVGPAT---     | 332 |
| Babsiella_Gp27_ClusterI  | YQAVVDVELSDPLGTLRAIIRAIPTV---LAEAGVSV-----L-----             | 297 |
| Rubeelu_Gp27_ClusterN    | YQAVVEVELSDPLGTLRAIVASIPRV---LAEAGIKLP-----L-----            | 293 |
| Jebeks_Gp27_ClusterP     | YQAVVDVELSDPLGTLRAIIRAIPTV---LAEAGVSV-----L-----             | 293 |
| Cuke_31_ClusterAC        | YDGLTDLQFHDPFKAVKDVGVVTKSDLMILAGAQPTNPFVWVTHIPQFIDISTKAVN--  | 258 |
| Porky_Gp35_ClusterE      | YDILTKLQFHDMLGLAVNMFKALSNDKGIIAQVMRVLAV-----PLPGVIDAG-RAAVYA | 246 |
| Bipper_Gp35_ClusterY     | YAALTKLQLHDPWQLVQAMLALIQSDEF-ADALAELLDP-----LFPGLATTLGELTGMD | 240 |

|                          |                                 |                                             |            |
|--------------------------|---------------------------------|---------------------------------------------|------------|
| Dori_Gp41_Singleton      | ALPILAAVTGAGSGLLGSVIGGVL----    | GAK-----D-                                  | 340        |
| Sparky_Gp27_Singleton    | AAPVLAGVTGAGGGLLNTVIGGVL----    | GAK-----D-                                  | 343        |
| Adjutor_Gp40_ClusterD    | AGGILASATGLPMNLLHGLLSGVA----    | AAD-----N-                                  | 356        |
| Predator_Gp40_ClusterH   | ALSTLSGLQGLGSNPLFGSLMGQA----    | GND-----GNA-                                | 348        |
| Nilo_Gp40_ClusterP       | -----                           | AGGPA-                                      | 291        |
| Patience_Gp42_ClusterU   | -----                           | SGGPA-                                      | 285        |
| Gaia_Gp34_ClusterX       | -----                           | FNGRDF                                      | 229        |
| Bricole_Gp38_ClusterM    | -----                           | IVGTD-                                      | 265        |
| TM4_Gp30_ClusterK        | -----GLLGGLGGGLLGGGKGGQLPSGLVLP | PGVQGGAL-----TDHQR-                         | 326        |
| Courthouse_Gp48_ClusterJ | -----                           | GND-                                        | 261        |
| Kumao_GP39_Singleton     | -----                           | GRD-                                        | 267        |
| Cosmo_Gp52_ClusterV      | -----                           | FGGPD-                                      | 268        |
| Ms6_LysB_ClusterF        | -----                           | FTGPD-                                      | 280        |
| Corndog_Gp70_ClusterO    | -----                           | FTGTD-                                      | 294        |
| Bxz1_Gp238_ClusterC      | -----                           | LSGPD-                                      | 290        |
| MooMoo_Gp29_Singleton    | -----                           | FSGPD-                                      | 281        |
| D29_Gp12_ClusterA        | -----                           | IGGRD-                                      | 198        |
| LeBron-Gp26_ClusterL     | -----                           | LKGEN-                                      | 289        |
| MosMoris_Gp54_ClusterS   | GALAPL-----                     | GDLL-----MAGRGIL-----                       | 299        |
| 32HC_37_ClusterZ         | GALSSI-----                     | RSMVTIGGLGM-----APATSAGDV-----              | 299        |
| BPs_Gp28_ClusterG        | -----                           | GALAGGPAGLTTFAIPLLL-----                    | 331        |
| Giles_Gp32_ClusterQ      | -----                           | KALAGGPAGLAGLVPLIM-----                     | 338        |
| Orion_Gp50_ClusterB      | -----GGGGLLGGLLGGGLGGLLGGG-     | MANPAALLANPLAAIPLLLPLFT-----                | 376        |
| Babsiella_Gp27_ClusterI  | -----                           | LAHAGLSAGNPVEMAGVALPVL-----                 | 320        |
| Rubeelu_Gp27_ClusterN    | -----                           | FAPPAASA-EPAAAAAMLLPAL-----                 | 315        |
| Jebeks_Gp27_ClusterP     | -----                           | LAHAGLSAGNPVEMAGVALPVL-----                 | 316        |
| Cuke_31_ClusterAC        | -----                           |                                             | 258        |
| Porky_Gp35_ClusterE      | GTFVQGT                         | RPHITLAETGRVARAVWHLNRIGAKTLARAS-----        | 285        |
| Bipper_Gp35_ClusterY     | GAALLANRKPVG                    | GGVGLGGLMSGQLLTTTPAGGNLLGGLIGAGTGVLGGLLDGVI | PGGLP- 299 |

## H

|                          |                   |                                       |                                           |
|--------------------------|-------------------|---------------------------------------|-------------------------------------------|
| Dori_Gp41_Singleton      | -KPNPELIELLSVR--- | GVLTNLGELIAL-----LAALP-GLQA           | HGEYHLP-KPEFNG 387                        |
| Sparky_Gp27_Singleton    | -KPNPELIELLSVR--- | GVLTNIPQLVAL-----LAALP-GLQS           | HGEYHLP-KPEFNG 390                        |
| Adjutor_Gp40_ClusterD    | -APNPKLIELLSVR--- | GVLTNIPQLIKL-----LTNIS-GVQT           | HGEYHLP-KPEFNG 403                        |
| Predator_Gp40_ClusterH   | -EEDRKMIELLSPT--- | GVLTNIPGLIQL-----IAALP-GLQA           | HGEYHLP-KAEFNG 395                        |
| Nilo_Gp40_ClusterP       | -GLLQRI           | GDFLMD-----PLDGTIDIGLAIIGGVMF-MGN---  | MEPHGGYDLN--PC--- 336                     |
| Patience_Gp42_ClusterU   | -GLLAR            | VDLLVN-----PIDDVIPITLALYDAIRFGAGG---  | IRAHGGYDME--PA--- 331                     |
| Gaia_Gp34_ClusterX       | LAFAKEIAELFIK---- | PLSQVLPLVQAIWNGLTFLGQGS--SAPHW        | TYNVM--PA--- 277                          |
| Bricole_Gp38_ClusterM    | -SLIEQVGEMFOR---- | PITEVGAAMWAIFLGGQFVATRPYPTMPHINYDIN-- | PAVAI 317                                 |
| TM4_Gp30_ClusterK        | -GLVEAVLALLAN---- | PFAEVPAAVKAIVSGVGFIATNP-PTAPHIEYHIR-- | EAAPG 377                                 |
| Courthouse_Gp48_ClusterJ | -ALVSQVIELFTN---- | PFAEVP                                | PAVVKAIASGIGFVTSNP-PTAAHIEYHIR--ECVPG 312 |
| Kumao_GP39_Singleton     | -NLGEQVLEVL       | LMN-----PFAEVP                        | PAVVKAIVSGLGFVTANP-PTAPHIEYHIR--ECFPG 318 |

|                         |                                                 |                |     |
|-------------------------|-------------------------------------------------|----------------|-----|
| Cosmo_Gp52_ClusterV     | -SILRQVIELGLD-----PFGEAIPMIKAISDAGMFFINR---TTPH | INYNVG--PA---  | 314 |
| Ms6_LysB_ClusterF       | -SLLAQVIELAQ-----PLPETIAITRAILDAGMFFAKR---TGPH  | VVDYNPQ--PA--- | 326 |
| Corndog_Gp70_ClusterO   | -SLLAQAIELSQM-----PIPRTIAAFKALIDAGMFFAKG---TGPH | VVDYGIG--PA--- | 340 |
| Bxz1_Gp238_ClusterC     | -SLLRQFLEIAEA-----PVPNAIAAFQAFMDAGLFFVKG---TRPH | TNYHIG--AA---  | 336 |
| MooMoo_Gp29_Singleton   | -SILAQVLEVMGIRQDAGMVMEVMAIFKAIMDAGLFFLKG---TGPH | VNYNIQ--PA---  | 332 |
| D29_Gp12_ClusterA       | -SVVAQLIELGQR-----PITEGIALAGAIIDALTFFARSRMGDKWP | HLNRY--PA---   | 247 |
| LeBron-Gp26_ClusterL    | -NILAQIAELLQQ-----PVLHIIPLFQSIVDAGMFFTAG---VDGP | HNYAIQ--PA---  | 335 |
| MosMoris_Gp54_Clusters  | -----NPAQMFAILPDLFNLLFDAIKFV-----ATNAH          | GKYGDPGYALWGG  | 340 |
| 32HC_37_ClusterZ        | -----NLMAMITNIPAI IQSIAAALKFV-----QTNAH         | YHYHDQPPYWRG   | 340 |
| BPs_Gp28_ClusterG       | -SSIRGFIPG---GNADLTGTAAAAKAATIGLQFLFA---GTAPH   | IRYHID--EAWPG  | 381 |
| Giles_Gp32_ClusterQ     | -GLLGGLIGG---QK--NPTGVAAAAQA AVIALQFVTSNP-PTAAH | IQYEFR--EVWPG  | 388 |
| Orion_Gp50_ClusterB     | -SALPGLIAGVGGPGTGGALTGPAAAAQAAILGMKFLFA---GTRPH | IEYHIR--EVWPG  | 430 |
| Babsiella_Gp27_ClusterI | -STLAGLIGG---AAGGPLTGPAAAVQAIIAIRFAAS---GTAPH   | INYHAW--EVWPG  | 370 |
| Rubeelu_Gp27_ClusterN   | -ATLPGLTGA---D-PARPSGPAAAVQAIIIALRFAAS---GTAPH  | INYHAW--EVWPG  | 364 |
| Jebeks_Gp27_ClusterP    | -STLGGLVGG---AVGGQLTGPAAAVQAIVALKFVA---GTAPH    | INYHAW--EVWPG  | 366 |
| Cuke_31_ClusterAC       | -----SLDALARFA-----SSGAH                        | GHYGDW--EIIPG  | 283 |
| Porky_Gp35_ClusterE     | -----                                           |                | 285 |
| Bipper_Gp35_ClusterY    | -PIVGGLLGGS--GPGGTPTGMYKLGKTFAALLNFA-----TTNDH  | HGHYHDT--PAFAG | 349 |

|                          |                                                |     |
|--------------------------|------------------------------------------------|-----|
| Dori_Gp41_Singleton      | -RTGIQVAYDVVASFRR---PPIASP-----                | 409 |
| Sparky_Gp27_Singleton    | -RTGIQVG YDVVA AFRR-----                       | 406 |
| Adjutor_Gp40_ClusterD    | -RSGIQVGCDIVAGFRR-----                         | 419 |
| Predator_Gp40_ClusterH   | -RTGIQVGCDIVAAFR-----                          | 411 |
| Nilo_Gp40_ClusterP       | -----VEYMRGVGT RRA-----                        | 349 |
| Patience_Gp42_ClusterU   | -----VQFCRERLAA-----                           | 341 |
| Gaia_Gp34_ClusterX       | -----ADYLIELGANIRER GVA-----                   | 294 |
| Bricole_Gp38_ClusterM    | -LRRIAA-----                                   | 323 |
| TM4_Gp30_ClusterK        | -VTYFQHAIDYLRQVGASVAARAA-----                  | 400 |
| Courthouse_Gp48_ClusterJ | -VTYFDHAMGYVRQVISANKRIA-----                   | 334 |
| Kumao_GP39_Singleton     | -VTHFEHAVDYVRRRAVSAGMRIE-----                  | 340 |
| Cosmo_Gp52_ClusterV      | -----VDFLAGL-----                              | 321 |
| Ms6_LysB_ClusterF        | -----IDYLRT-----                               | 332 |
| Corndog_Gp70_ClusterO    | -----IEYLRS-----                               | 346 |
| Bxz1_Gp238_ClusterC      | -----VDYLRS-----                               | 342 |
| MooMoo_Gp29_Singleton    | -----IEYL RAT-----                             | 339 |
| D29_Gp12_ClusterA        | -----VEFLRQI-----                              | 254 |
| LeBron-Gp26_ClusterL     | -----IDYLRSVV-----                             | 343 |
| MosMoris_Gp54_Clusters   | -MTAVDHAAATIRERVNGATL FLLPGTWSMWNQLFPFD TAVRLQ | 384 |
| 32HC_37_ClusterZ         | -LTGVDCAAQVISESVE-RATVFTVPGTVSHWNDGPPAWTAWKLP  | 383 |
| BPs_Gp28_ClusterG        | GPTFLDLARQHVRDWT SR--PAA-----                  | 402 |
| Giles_Gp32_ClusterQ      | -QTYLGLAIQHVRDWAGR--TPAVTA-----                | 411 |
| Orion_Gp50_ClusterB      | -QTYIGLAVQHVRDWVGR--ELPA-----                  | 451 |

|                         |                                   |     |
|-------------------------|-----------------------------------|-----|
| Babsiella_Gp27_ClusterI | -QTYLGLAVQHVRDWAQR--VPVRA-----    | 392 |
| Rubeelu_Gp27_ClusterN   | -QTYLGLAIQHVRDWASR--TPVRN-----    | 386 |
| Jebeks_Gp27_ClusterP    | -QTYLGLAIQHVRDWASR--TPVRA-----    | 388 |
| Cuke_31_ClusterAC       | -FTPIFHCIRSAKYAAKG--IGYAVPGI----- | 308 |
| Porky_Gp35_ClusterE     | -----                             | 285 |
| Bipper_Gp35_ClusterY    | -TNAVAHAVGEVNRLAA-----            | 365 |

Figure S2. Alignment of LysB proteins. The conserved pentapeptide (G/A-X-S-X-G) is colored pink. The conserved amino acids candidates to be part of the catalytic triad, Ser, Asp and His are highlighted in pink, light blue or yellow backgrounds respectively. The already identified catalytic triad of LysB D29 Ser82, Asp166 and His240 are colored red. The dashed blue lines represent the absent N-terminus region. Numbers refer to the amino acid positions. A representative of each cluster, for which a *lysB* gene was identified, was selected from the Actinobacteriophage database ([www.phagesdb.org](http://www.phagesdb.org)). Accession numbers are indicated in Table S1.
