# Supplementary material for: Mycobacteriophage Lysis Enzymes: Targeting the Mycobacterial Cell Envelope
Source: MDPI journal article supplement (doi:10.3390/v10080428), 2018-08-14
Supplement: s1 [file s1]

**Table S1:** Coordinates of LysB coding genes

| Phage Name | Cluster   | LysB coding gene | Position |        | Number of AA | Pham  | Extended N-terminus | LysB Acession Number |
|------------|-----------|------------------|----------|--------|--------------|-------|---------------------|----------------------|
|            |           |                  | start    | end    |              |       |                     |                      |
| D29        | A         | gp12             | 6606     | 7370   | 254          | 45275 | -                   | AAC18452             |
| Orion      | B         | gp50             | 41837    | 43192  | 451          | 609   | +                   | ABD58366             |
| Bxz1       | C         | gp238            | 145870   | 146898 | 342          | 45104 | +                   | AAN16870             |
| Adjuator   | D         | gp40             | 32695    | 33954  | 419          | 4477  | +                   | ACD49625             |
| Porky      | E         | gp35             | 31695    | 32552  | 285          | 45302 | -                   | ACF33852             |
| Ms6*       | F         | gp3              | 2371     | 3369   | 332          | 45104 | +                   | AAG48319             |
| BPs        | G         | gp28             | 25201    | 26409  | 402          | 609   | +                   | ACB58187             |
| Predator   | H         | gp40             | 33027    | 34262  | 411          | 4477  | +                   | ACF05137             |
| Babsiella  | I         | gp27             | 24108    | 25286  | 392          | 609   | +                   | AER48404             |
| Courthouse | J         | gp48             | 39086    | 40090  | 334          | 45262 | +                   | AER47899             |
| TM4        | K         | gp30             | 24984    | 26186  | 400          | 6899  | +                   | AAD17597             |
| LeBron     | L         | gp26             | 25573    | 26604  | 343          | 45104 | +                   | ADL70993             |
| Bricole    | M         | gp38             | 31780    | 32751  | 323          | 45104 | +                   | ALF00566             |
| Rubeelu    | N         | gp27             | 22757    | 23917  | 386          | 609   | +                   | AXC38538             |
| Corndog    | O         | gp70             | 44462    | 45502  | 346          | 45104 | +                   | AAN02002             |
| Jebeks     | P         | gp27             | 24037    | 25203  | 388          | 609   | +                   | AVD98065             |
| Giles      | Q         | gp32             | 28339    | 29574  | 411          | 609   | +                   | ABW88427             |
| Nilo       | R         | gp40             | 35349    | 36398  | 349          | 45104 | +                   | AVO21438             |
| MosMoris   | S         | gp29             | 31775    | 32929  | 384          | 928   | +                   | AHY84128             |
| Patience   | U         | gp42             | 35792    | 36817  | 341          | 45256 | +                   | AEL97951             |
| Cosmo      | V         | gp52             | 38381    | 39346  | 321          | 45283 | +                   | AJD82124             |
| Gaia       | X         | gp34             | 30705    | 31589  | 294          | 8237  | -                   | AID58854             |
| Bipper_    | Y         | gp35             | 30012    | 31109  | 365          | 18051 | -                   | AMQ66971             |
| 32HC_      | Z         | gp37             | 28787    | 29938  | 383          | 928   | +                   | AHJ86315             |
| Cuke       | AC        | gp31             | 27339    | 28265  | 308          | 24285 | -                   | AVD99649             |
| Dori_      | Singleton | gp41             | 36640    | 37869  | 409          | 4477  | +                   | AER47691             |
| Kumao      | Singleton | gp39             | 34279    | 35301  | 340          | 45104 | +                   | ATN94002             |
| MooMoo_    | Singleton | gp54             | 26730    | 27749  | 339          | 45104 | +                   | AVO21635             |
| Sparky     | Singleton | gp27             | 25276    | 26496  | 406          | 4477  | +                   | AII28175             |

\*Ms6 coordinates regards to the lytic cassette since the complete genome sequence is not yet available
